# Supplementary material for: Measures of wave intensity as a non-invasive surrogate for cardiac function predicts mortality in haemodialysis patients
Source: PubMed Central journal article supplement (PMC11270016; doi:10.1093/ckj/sfae172), 2024-06-27
Supplement: sfae172_supplemental_file.pdf [file sfae172_supplemental_file.pdf]

## --- DATA SUPPLEMENT ---

### **Measure of wave intensity as non-invasive surrogate for cardiac function predicts mortality in hemodialysis patients**

Christopher C. Mayer, PhD<sup>1,2</sup>, Pantelis A. Sarafidis, PhD, MD<sup>3</sup>, Julia Matschkal, MD<sup>4</sup>, Marieta Theodorakopoulou, MD<sup>3</sup>, Georg Lorenz, MD<sup>4</sup>, Artemios Karagiannidis, MD<sup>3</sup>, Susanne Angermann, MD<sup>4</sup>, Fotini Iatridi, MD<sup>3</sup>, Matthias C. Braunisch, MD<sup>4</sup>, Antonios Karpetas, MD, PhD<sup>5</sup>, Marcus Baumann, PhD, MD<sup>4</sup>, Eva Pella, MD<sup>3</sup>, Uwe Heemann, MD<sup>4</sup>, Siegfried Wassertheurer, PhD<sup>1,2</sup>, Christoph Schmaderer, MD<sup>4</sup>

<sup>1</sup> AIT Austrian Institute of Technology GmbH, Center for Health & Bioresources, Biomedical Systems, Giefinggasse 4, 1210 Vienna, Austria

<sup>2</sup> TU Wien, Institute for Analysis and Scientific Computing, Wiedner Hauptstr. 8-10, 1040 Vienna, Austria

<sup>3</sup> Aristotle University of Thessaloniki, Hippokration Hospital, Department of Nephrology, Konstantinoupoleos 49, 54642 Thessaloniki, Greece

<sup>4</sup> Technical University of Munich, School of Medicine, Klinikum rechts der Isar, Department of Nephrology, Ismaninger Strasse 22, 81675 Munich, Germany

<sup>5</sup> Therapeutiki Hemodialysis Unit, Thessaloniki, Greece

**Table S1: Baseline characteristics of patients from the ISAR and the NGHN cohort separately.**

| Characteristic                       | NGHN             | ISAR             | All              |
|--------------------------------------|------------------|------------------|------------------|
| N                                    | 214              | 344              | 558              |
| Age (yr)                             | 62.5 [52,74]     | 69 [55,77]       | 66 [53,76]       |
| Sex-male, n (%)                      | 139 (65 %)       | 234 (68 %)       | 373 (67 %)       |
| Body mass index (kg/m <sup>2</sup> ) | 25.7 [23.2,29.5] | 25.2 [22.8,28.7] | 25.4 [22.9,28.9] |
| Dialysis vintage (mo)                | 28.0 [12.0,59.0] | 41.1 [22.7,76.6] | 35.5 [17.3,70.5] |
| Effective time of dialysis (h)       | 4.0 [4.0,4.0]    | 4.23 [4.0,4.5]   | 4.02 [4.0,4.38]  |
| UFV (ml)                             | 2057 (1003 SD)   | 2220 (1127 SD)   | 2158 (1083 SD)   |
| UF rate (ml/h)                       | 527 (263 SD)     | 501 (248 SD)     | 511 (254 SD)     |
| Serum albumin (g/l)                  | 40.2 (3.72 SD)   | 39.9 (4.14 SD)   | 40 (3.99 SD)     |
| Presence of diabetes, n (%)          | 63 (29 %)        | 135 (39 %)       | 198 (35 %)       |
| History of hypertension*, n (%)      | 196 (92 %)       | 326 (95 %)       | 522 (94 %)       |
| Use of statin, n (%)                 | 94 (44 %)        | 136 (40 %)       | 230 (41 %)       |
| Use of anticoagulation med, n (%)    | 131 (61 %)       | 52 (15 %)        | 183 (33 %)       |
| Use of antihypertensive med, n (%)   | 179 (84 %)       | 314 (91 %)       | 493 (88 %)       |
| SBP (mmHg)                           | 130 (18.1 SD)    | 123 (17 SD)      | 126 (17.8 SD)    |
| DBP (mmHg)                           | 78.5 (12 SD)     | 72.4 (11.8 SD)   | 74.8 (12.2 SD)   |
| PP (mmHg)                            | 50.6 [42.8,60]   | 48.7 [41.2,56.5] | 49 [41.6,57.7]   |
| Heart rate (1/min)                   | 73.2 (8.99 SD)   | 71.5 (10 SD)     | 72.2 (9.67 SD)   |
| SDR (-)                              | 2.43 [2.07,2.77] | 2.51 [2.16,3.01] | 2.48 [2.12,2.92] |
| All-cause mortality, n (%)           | 78 (36 %)        | 115 (33 %)       | 193 (35 %)       |
| CV mortality, n (%)                  | 45 (21 %)        | 47 (14 %)        | 92 (16 %)        |

Results are presented as mean (standard deviation) and median [inter-quartile range] for normally and non-normally distributed data, respectively; categorical data as total number (percentage).

Abbreviations: UF, ultrafiltration; UFV, ultrafiltration volume; SBP, systolic blood pressure; DBP, diastolic blood pressure; PP, pulse pressure; SDR, S to D ratio from wave intensity analysis; AF, atrial fibrillation; HF, heart failure; CV, cardiovascular. \*History of hypertension was defined as either use of antihypertensive medication and/or 24h blood pressure >140/90 mmHg.

**Table S2: Baseline characteristics of excluded and included patients of pre-/early- and post-dialytic analysis.**

| <b>Characteristic</b>                | <b>Pre-/Early- and<br/>/Post-dialytic<br/>Subgroup</b> | <b>Excluded</b>  | <b>All</b>       |
|--------------------------------------|--------------------------------------------------------|------------------|------------------|
| N                                    | 438                                                    | 120              | 558              |
| Age (yr)                             | 65 [52,75]                                             | 69 [58,77]       | 66 [53,76]       |
| Sex-male, n (%)                      | 282 (64 %)                                             | 91 (76 %)        | 373 (67 %)       |
| Body mass index (kg/m <sup>2</sup> ) | 25.5 [23,29.3]                                         | 25 [22.6,28.1]   | 25.4 [22.9,28.9] |
| Dialysis vintage (mo)                | 33.4 [16.4,67]                                         | 47.2 [23.7,79.6] | 35.5 [17.3,70.5] |
| Effective time of dialysis (h)       | 4.00 [4.00,4.37]                                       | 4.17 [4.00,4.43] | 4.02 [4.00,4.38] |
| UFV (ml)                             | 2151 (1088 SD)                                         | 2180 (1070 SD)   | 2158 (1083 SD)   |
| UF rate (ml/h)                       | 512 (256 SD)                                           | 510 (248 SD)     | 511 (254 SD)     |
| Serum albumin (g/l)                  | 40.0 [38.0,42.3]                                       | 39.6 [37.9,42.0] | 40.0 [38.0,42.2] |
| Presence of diabetes, n (%)          | 159 (36 %)                                             | 39 (33 %)        | 198 (35 %)       |
| History of hypertension*, n (%)      | 410 (94 %)                                             | 112 (93 %)       | 522 (94 %)       |
| Use of statin, n (%)                 | 184 (42 %)                                             | 46 (38 %)        | 230 (41 %)       |
| Use of anticoagulation med, n (%)    | 155 (35 %)                                             | 28 (23 %)        | 183 (33 %)       |
| Use of antihypertensive med, n (%)   | 388 (89 %)                                             | 105 (88 %)       | 493 (88 %)       |
| SBP (mmHg)                           | 132 [119,145]                                          | 129 [114,146]    | 132 [119,145]    |
| DBP (mmHg)                           | 80.8 (13.9 SD)                                         | 80.7 (15.6 SD)   | 80.8 (14 SD)     |
| PP (mmHg)                            | 50.5 [42.4,60.8]                                       | 50.8 [43.5,63.1] | 50.5 [42.5,60.8] |
| Heart rate (1/min)                   | 71.7 (10.6 SD)                                         | 74.7 (13.6 SD)   | 71.9 (10.9 SD)   |
| SDR (-)                              | 2.48 [2.12,2.88]                                       | 2.46 [2.11,3.04] | 2.48 [2.12,2.92] |
| All-cause mortality, n (%)           | 150 (34 %)                                             | 43 (36 %)        | 193 (35 %)       |
| CV mortality, n (%)                  | 71 (16 %)                                              | 21 (18 %)        | 92 (16 %)        |

Results are presented as mean (standard deviation) and median [inter-quartile range] for normally and non-normally distributed data, respectively; categorical data as total number (percentage).

Abbreviations: UF, ultrafiltration; UFV, ultrafiltration volume; SBP, systolic blood pressure; DBP, diastolic blood pressure; PP, pulse pressure; SDR, S to D ratio from wave intensity analysis; AF, atrial fibrillation; HF, heart failure; CV, cardiovascular. \*History of hypertension was defined as either use of antihypertensive medication and/or 24h blood pressure >140/90 mmHg.

**Table S3: Reasons for cardiovascular death**

In the table, the reasons for cardiovascular death are presented for the whole study population and the two dedicated groups based on atrial fibrillation and heart failure.

| <b>Reasons</b>                  | <b>AForHF (N=196)</b> | <b>noAForHF (N=362)</b> | <b>All (N=558)</b> |
|---------------------------------|-----------------------|-------------------------|--------------------|
| Sudden cardiac death            | 31                    | 23                      | 54                 |
| Myocardial infarction           | 3                     | 6                       | 9                  |
| Heart failure                   | 7                     | 4                       | 11                 |
| Major stroke                    | 3                     | 3                       | 6                  |
| Cardiac surgical procedure      | 0                     | 2                       | 2                  |
| Pulmonary embolism              | 1                     | 1                       | 2                  |
| Other cardiovascular reasons    | 3                     | 5                       | 8                  |
| Number of cardiovascular deaths | 48                    | 44                      | 92                 |

Abbreviations: AF, atrial fibrillation; HF, heart failure.

**Figure S4: Detailed description and visualization for calculation of SDR** (updated and based on own prior work [1]): Brachial pulse waveforms were obtained with the oscillometric Mobil-O-Graph 24-hour PWA device (A) and transformed to the aortic pressure  $P$  using the validated ARCSolver Transfer Function (B). Aortic blood flow  $Q$  was then determined by combining a Windkessel model relating pressure and flow with a minimal work criterion using the ARCSolver® algorithms (AIT Austrian Institute of Technology GmbH, Vienna, Austria) as described in [2] (C). Aortic blood flow was subsequently used as an estimate of flow velocity  $U$  [3]. Since PU-loop during early systole is approximately linear, pulse wave velocity  $c$  times blood density  $\rho$ , which reflects the blood density ( $1050 \text{ kg/m}^3$ ) is estimated from the slope (D). Consequently, changes in pressure ( $dP$ ) and flow velocity ( $dU$ ) were computed and separated into forward and backward travelling components using the Waterhammer equations  $dP_{f,b} = \pm \rho c dU_{f,b}$  and a linearity assumption  $dP = dP_f + dP_b$  and  $dU = dU_f + dU_b$  [1,4], where  $dP$  and  $dQ$  denote changes per time step and subscripts  $f$  and  $b$  denote forward and backward travelling components, respectively. Finally, forward and backward wave intensities are defined as the product of changes in pressure and flow velocity as  $dI_{f,b} = dP_{f,b} * dU_{f,b}$ , see E [1,5]. Forward wave intensity is characterized by two dominant peaks, called S and D.

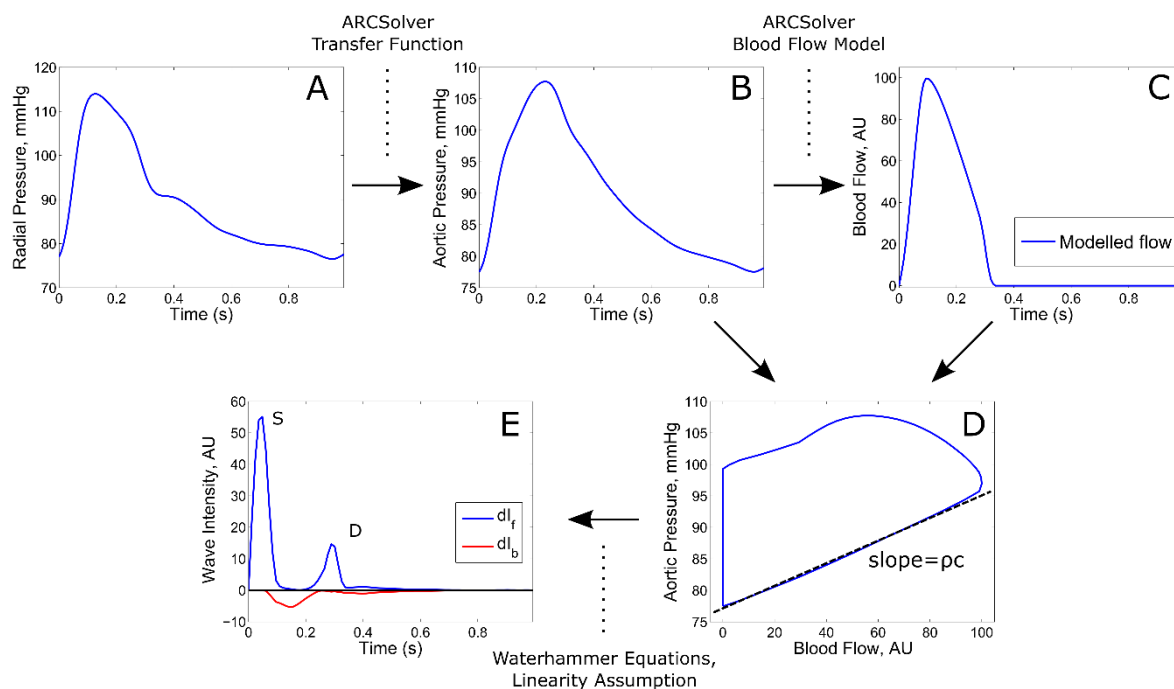

- [1] Hametner B, Parragh S, Weber T, Wassertheurer S. Wave intensity of aortic root pressure as diagnostic marker of left ventricular systolic dysfunction. *PLoS One*. 2017;12(6):e0179938. doi: 10.1371/journal.pone.0179938.
- [2] Hametner B, Wassertheurer S, Kropf J, Mayer C, Holzinger A, Eber B, Weber T. Wave reflection quantification based on pressure waveforms alone--methods, comparison, and clinical covariates. *Comput Methods Programs Biomed*. 2013;109(3):250-9. doi: 10.1016/j.cmpb.2012.10.005.

- [3] Hametner B, Wassertheurer S, Kropf J, Mayer C, Holzinger A, Eber B, et al. Wave reflection quantification based on pressure waveforms alone-Methods, comparison, and clinical covariates. *Comput Meth Programs Biomed* 2013; 109(3):250–9.
- [4] Parker K, Jones C. Forward and backward running waves in the arteries: analysis using the method of characteristics. *J Biomech Eng* 1990; 112(3):322–6.
- [5] Mynard JP, Kondiboyina A, Kowalski R, Cheung MMH, Smolich JJ. Measurement, Analysis and Interpretation of Pressure/Flow Waves in Blood Vessels. *Front Physiol.* 2020 Aug 27;11:1085. doi: 10.3389/fphys.2020.01085.
